# Supplementary material for: Pteropods are excellent recorders of surface temperature and carbonate ion concentration
Source: PubMed Central journal article supplement (PMC5626693; doi:10.1038/s41598-017-11708-w), 2017-10-03
Supplement: 41598_2017_11708_MOESM1_ESM.pdf [file 41598_2017_11708_MOESM1_ESM.pdf]

## SUPPLEMENTARY INFORMATION

### **Pteropods are excellent recorders of surface temperature and carbonate ion concentration**

N. Keul<sup>1\*</sup>, K.T.C.A. Peijnenburg<sup>2,3</sup>, N. Andersen<sup>4</sup>, V. Kitidis<sup>5</sup>, E. Goetze<sup>6</sup>, R. Schneider<sup>1</sup>

<sup>1</sup> *Institute of Geosciences, Christian-Albrechts-Universität zu Kiel, Ludewig-Meyn-Str.10, 24118 Kiel, Germany*

<sup>2</sup> *Naturalis Biodiversity Center, P.O. Box 9517, 2300 RA Leiden, The Netherlands*

<sup>3</sup> *Institute for Biodiversity and Ecosystem Dynamics (IBED), University of Amsterdam, P.O. Box 94248, 1090 GE Amsterdam, The Netherlands*

<sup>4</sup> *Leibniz-Labor für Altersbestimmung und Isotopenforschung, Christian-Albrechts-Universität zu Kiel, Max-Eyth-Str.11-13, 24118 Kiel, Germany*

<sup>5</sup> *Plymouth Marine Laboratory, Plymouth, United Kingdom*

<sup>6</sup> *Department of Oceanography, University of Hawai'i at Mānoa, 1000 Pope Road, Honolulu, HI 96822, USA*

\* Correspondence to [nina.keul@gmail.com](mailto:nina.keul@gmail.com).

Table S1: Sampling information of *H. inflatus* pteropods used in this study.

| Plankton Station/<br>Cruise | Corresponding CTD Station<br>(Table 2) | Latitude | Longitude | Date     | Local time<br>(start tow) | Tow duration<br>(min) | Max depth of tow (m) |
|-----------------------------|----------------------------------------|----------|-----------|----------|---------------------------|-----------------------|----------------------|
| 15/AMT22                    | 15                                     | 32.00    | -30.74    | 10/19/12 | 2:41                      | 47                    | 363                  |
| 23/AMT22                    | 23                                     | 23.15    | -40.63    | 10/23/12 | 2:43                      | 48                    | 361                  |
| 25/AMT22                    | 25                                     | 20.40    | -38.61    | 10/24/12 | 2:45                      | 47                    | 336                  |
| 37/AMT22                    | 37                                     | 4.05     | -26.46    | 10/30/12 | 2:42                      | 53                    | 388                  |
| 43/AMT22                    | 42                                     | -4.62    | -25.02    | 11/2/12  | 2:42                      | 48                    | 488                  |
| 49/AMT22                    | 48                                     | -15.29   | -25.07    | 11/5/12  | 2:39                      | 48                    | 322                  |
| 51/AMT22                    | 50                                     | -18.49   | -25.10    | 11/6/12  | 2:42                      | 48                    | 373                  |
| 57/AMT22                    | 56                                     | -25.73   | -24.99    | 11/10/12 | 2:24                      | 47                    | 350                  |
| 60/AMT22                    | 60                                     | -30.17   | -27.91    | 11/12/12 | 2:25                      | 48                    | 323                  |
| 62/AMT22                    | 62                                     | -34.12   | -33.50    | 11/14/12 | 2:39                      | 48                    | 376                  |
| 66/AMT22                    | 66                                     | -38.08   | -39.31    | 11/16/12 | 2:43                      | 50                    | 292                  |

Table S2: Individual and average (avg.)  $\delta^{18}\text{O}_{\text{ptero}}$  and  $\delta^{13}\text{C}_{\text{ptero}}$  based on measurements of individual pteropod shells (ind. meas.), including the internal measurement error (internal error) and standard deviation (SD).

| CTD Station | $\delta^{18}\text{O}_{\text{ptero}}$ ind. meas. | $\delta^{18}\text{O}_{\text{ptero}}$ internal error | $\delta^{13}\text{C}_{\text{ptero}}$ ind. meas. | $\delta^{13}\text{C}_{\text{ptero}}$ internal error | $\delta^{18}\text{O}_{\text{ptero}}$ avg. | $\delta^{18}\text{O}_{\text{ptero}}$ SD | $\delta^{13}\text{C}_{\text{ptero}}$ avg. | $\delta^{13}\text{C}_{\text{ptero}}$ SD |
|-------------|-------------------------------------------------|-----------------------------------------------------|-------------------------------------------------|-----------------------------------------------------|-------------------------------------------|-----------------------------------------|-------------------------------------------|-----------------------------------------|
| 15          | 1.02                                            | 0.03                                                | 0.91                                            | 0.01                                                | 1.06                                      | 0.05                                    | 0.82                                      | 0.08                                    |
|             | 1.11                                            | 0.02                                                | 0.77                                            | 0.01                                                |                                           |                                         |                                           |                                         |
|             | 1.07                                            | 0.02                                                | 0.77                                            | 0.01                                                |                                           |                                         |                                           |                                         |
| 23          | 0.38                                            | 0.04                                                | 0.63                                            | 0.02                                                | 0.43                                      | 0.20                                    | 0.45                                      | 0.16                                    |
|             | 0.65                                            | 0.03                                                | 0.41                                            | 0.02                                                |                                           |                                         |                                           |                                         |
|             | 0.27                                            | 0.03                                                | 0.32                                            | 0.01                                                |                                           |                                         |                                           |                                         |
| 25          | 0.09                                            | 0.03                                                | 0.79                                            | 0.01                                                | 0.18                                      | 0.09                                    | 0.68                                      | 0.10                                    |
|             | 0.25                                            | 0.01                                                | 0.59                                            | 0.01                                                |                                           |                                         |                                           |                                         |
|             | 0.21                                            | 0.05                                                | 0.67                                            | 0.02                                                |                                           |                                         |                                           |                                         |
| 37          | 0.08                                            | 0.02                                                | 0.70                                            | 0.00                                                | -0.13                                     | 0.28                                    | 0.66                                      | 0.20                                    |
|             | -0.03                                           | 0.03                                                | 0.84                                            | 0.01                                                |                                           |                                         |                                           |                                         |
|             | -0.44                                           | 0.01                                                | 0.45                                            | 0.01                                                |                                           |                                         |                                           |                                         |
| 42          | 0.06                                            | 0.02                                                | 0.74                                            | 0.01                                                | 0.04                                      | 0.11                                    | 0.77                                      | 0.04                                    |
|             | -0.09                                           | 0.03                                                | 0.75                                            | 0.01                                                |                                           |                                         |                                           |                                         |
|             | 0.14                                            | 0.02                                                | 0.81                                            | 0.01                                                |                                           |                                         |                                           |                                         |
| 48          | 0.56                                            | 0.02                                                | 0.49                                            | 0.01                                                | 0.41                                      | 0.14                                    | 0.56                                      | 0.08                                    |
|             | 0.37                                            | 0.03                                                | 0.64                                            | 0.01                                                |                                           |                                         |                                           |                                         |
|             | 0.29                                            | 0.02                                                | 0.56                                            | 0.01                                                |                                           |                                         |                                           |                                         |
| 50          | 0.75                                            | 0.02                                                | 0.74                                            | 0.01                                                | 0.77                                      | 0.03                                    | 0.84                                      | 0.10                                    |
|             | 0.80                                            | 0.02                                                | 0.94                                            | 0.01                                                |                                           |                                         |                                           |                                         |
| 56          | 1.25                                            | 0.02                                                | 0.94                                            | 0.00                                                | 1.08                                      | 0.17                                    | 0.83                                      | 0.10                                    |
|             | 0.92                                            | 0.02                                                | 0.74                                            | 0.01                                                |                                           |                                         |                                           |                                         |
|             | 1.07                                            | 0.02                                                | 0.81                                            | 0.01                                                |                                           |                                         |                                           |                                         |
| 60          | 0.88                                            | 0.01                                                | 1.32                                            | 0.02                                                | 0.95                                      | 0.25                                    | 1.28                                      | 0.12                                    |
|             | 1.23                                            | 0.03                                                | 1.38                                            | 0.02                                                |                                           |                                         |                                           |                                         |
|             | 0.75                                            | 0.04                                                | 1.14                                            | 0.01                                                |                                           |                                         |                                           |                                         |
| 62          | 1.38                                            | 0.03                                                | 1.66                                            | 0.01                                                | 1.40                                      | 0.07                                    | 1.60                                      | 0.17                                    |
|             | 1.48                                            | 0.01                                                | 1.72                                            | 0.01                                                |                                           |                                         |                                           |                                         |
|             | 1.35                                            | 0.02                                                | 1.41                                            | 0.01                                                |                                           |                                         |                                           |                                         |
| 66          | 1.98                                            | 0.01                                                | 1.77                                            | 0.00                                                | 2.06                                      | 0.07                                    | 1.97                                      | 0.21                                    |
|             | 2.11                                            | 0.01                                                | 1.95                                            | 0.01                                                |                                           |                                         |                                           |                                         |
|             | 2.08                                            | 0.01                                                | 2.19                                            | 0.00                                                |                                           |                                         |                                           |                                         |

Table S3: Regional  $\delta^{13}\text{C}$ - DIC Relationships in the Atlantic Ocean determined for this study and basic statistics. n= total points, SE= standard error.

| Latitude    | n  | Slope   | SE Slope | Intercept | SE Intercept | R <sup>2</sup> |
|-------------|----|---------|----------|-----------|--------------|----------------|
| 30°N - 45°N | 94 | -0.0105 | 0.0012   | 22.947    | 2.537        | 0.44           |
| 15°N - 30°N | 90 | -0.0031 | 0.0006   | 7.934     | 1.166        | 0.35           |
| 0°N - 15°N  | 54 | -0.0029 | 0.0004   | 7.393     | 0.886        | 0.45           |
| 0°S - 23°S  | 69 | -0.0054 | 0.0005   | 12.735    | 0.987        | 0.65           |
| 23°S - 30°S | 38 | -0.0097 | 0.0023   | 21.641    | 4.850        | 0.31           |
| 30°S - 45°S | 57 | -0.0082 | 0.0018   | 18.503    | 3.798        | 0.25           |

Table S4: Matrix showing correlation of water parameters in the upper 300 m of the water column along the cruise track. Pearson's R is shown.

|                                    | $\delta^{13}\text{C}_{\text{DIC}}$ | carbonate ion<br>concentration | temperature | salinity |
|------------------------------------|------------------------------------|--------------------------------|-------------|----------|
| $\delta^{18}\text{O}_{\text{ara}}$ | -0.68                              | -0.89                          | -0.98       | -0.72    |
| $\delta^{13}\text{C}_{\text{DIC}}$ |                                    | 0.65                           | 0.63        | 0.31     |
| carbonate ion<br>concentration     |                                    |                                | 0.92        | 0.81     |
| temperature                        |                                    |                                |             | 0.79     |
